# Supplementary material
Source: Springer Nature journal article supplement (https://www.springermedizin.de/resource/supplementary/12885_2012_3826_MOESM4_ESM.pdf/9464508)

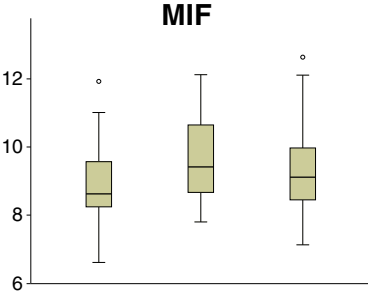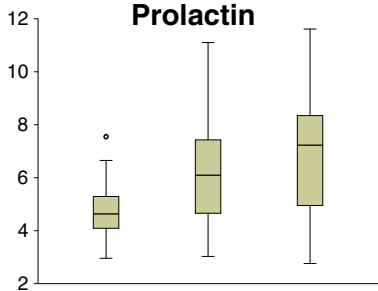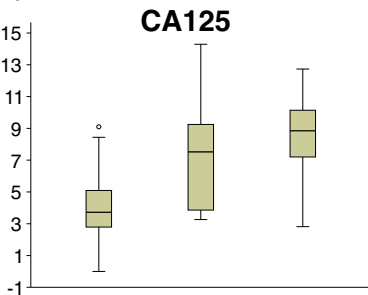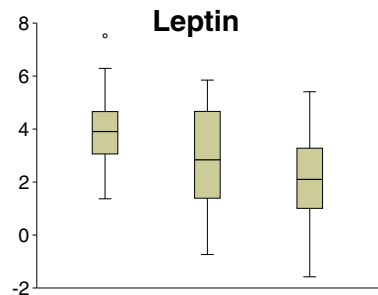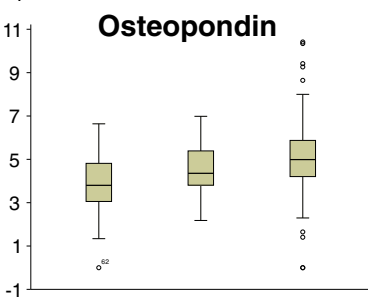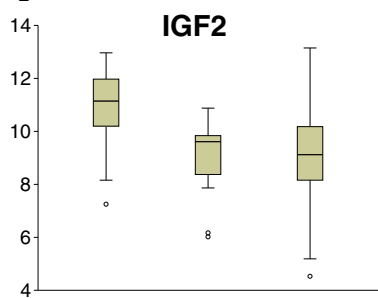

Control

FIGO I/II

FIGO III/IV

Control

FIGO I/II

FIGO III/IV

Supplement: MOESM4 [file 9464508]
